# Supplementary material
Source: PubMed Central journal article supplement (PMC3799199)
Supplement: tlo0605_0562SD1.pdf [file tlo0605_0562SD1.pdf]

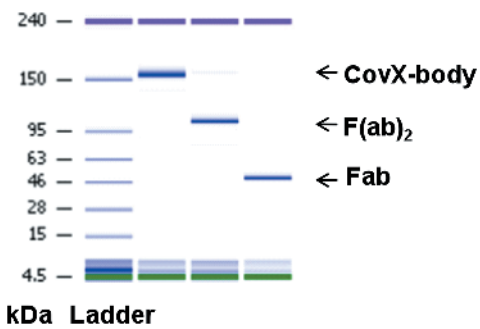

**Figure W1.** Purified fractions of CovX-body, F(ab)<sub>2</sub>, and Fab run on a Bioanalyzer protein electrophoresis chip (Agilent Technologies).

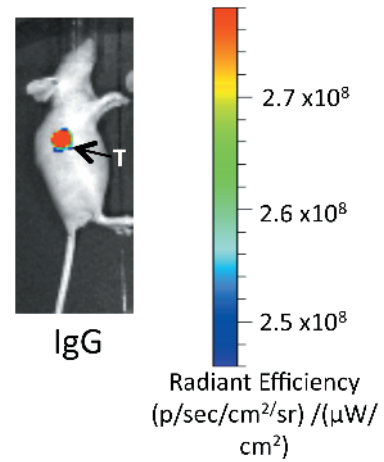

**Figure W2.** A representative image of IgG tumor uptake 8 hours after dosing. Clear uptake into the tumor (T) is seen.

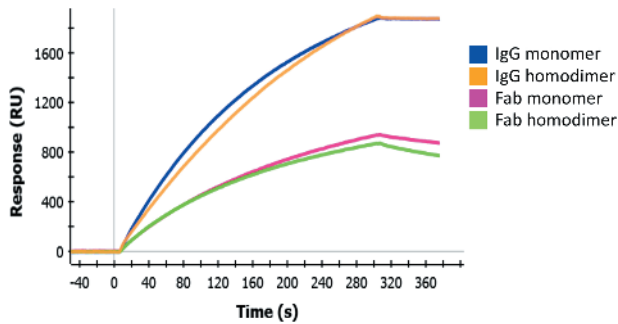

**Figure W4.** Anti-idiotype capture levels of anti-FGFR4 monomer and homodimer compounds to measure multivalent interactions. Comparable levels of monomer and homodimer constructs were captured with anti-idiotype CVX-2000.

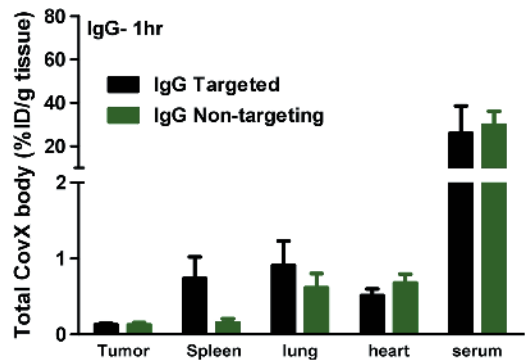

**Figure W3.** Tumor and normal tissue uptake of IgG 1 hour post dose.
